# Supplementary material for: The response of wildfire regimes to Last Glacial Maximum carbon dioxide and climate
Source: Copernicus journal article supplement (doi:10.5194/egusphere-2023-506), 2023-04-03
Supplement: Supplementary file 1 [file egusphere-2023-506-supplement.pdf]

# Supplementary information: The response of wildfire regimes to Last Glacial Maximum carbon dioxide and climate

Olivia Haas<sup>1,2</sup>, Iain Colin Prentice<sup>1,2</sup>, Sandy P. Harrison<sup>1,3</sup>

<sup>1</sup>Leverhulme Centre for Wildfires, Environment and Society, Imperial College London, South Kensington, London SW7 2BW, UK

<sup>2</sup>Georgina Mace Centre for the Living Planet, Department of Life Sciences, Imperial College London, Silwood Park Campus, Buckhurst Road, Ascot SL5 7PY, UK

<sup>3</sup>Geography & Environmental Science, University of Reading, Whiteknights, Reading RG6 6AH, UK

## S1. Obtaining Fraction of Absorbed Photosynthetically Active Radiation (fAPAR) from BIOME4.

BIOME4 (Kaplan et al., 2003) is a coupled biogeography and biogeochemistry with which we can simulate the equilibrium distribution of biomes from latitude, atmospheric CO<sub>2</sub> concentration, mean monthly precipitation, temperature, and cloud cover. One of the outputs provided by the model is monthly leaf area index (LAI), which we can convert to Fraction of Absorbed Photosynthetically Active Radiation (fAPAR) using Beer-Lambert law:

$$fAPAR = 1 - \exp(-k \cdot LAI) \quad (2)$$

where  $k \approx 0.5$ , a constant extinction coefficient (Saitoh et al., 2012).

fAPAR simulated from BIOME4 under modern-day conditions (2010-2015 seasonal climatology; Cucchi et al., 2020) overestimated fAPAR compared to observed fAPAR from NASA/GIMMS fAPAR 3g from the same period. As such, we rescaled the simulated BIOME fAPAR for each experiment such that:

$$fAPAR_{rescaled} = fAPAR_{exp} \frac{fAPAR_{obs}}{fAPAR_{sim}} \quad (3),$$

where  $fAPAR_{rescaled}$  is the monthly rescaled fAPAR for that experiment,  $fAPAR_{exp}$  is the original fAPAR output from BIOME4 for that experiment and  $\frac{fAPAR_{obs}}{fAPAR_{sim}}$  is a constant scaling factor, determined for each biome, where  $fAPAR_{obs}$  is the monthly NASA/GIMMS fAPAR 3g median value for that biome, and  $fAPAR_{sim}$  is the monthly fAPAR median value simulated by BIOME4 for that biome. This method provided a rescaled fAPAR for the modern day that was correlated at 0.63 with the observational data, compared to 0.13 for the original BIOME4 fAPAR output for the same period, a reasonable estimation of fAPAR for each of the experiments.

## S2. Obtaining burnt area mask for fire size and fire intensity experiments

In this analysis, we were interested in how the global pattern of burnt area (BA), fire size (FS) and fire intensity (FI) change under different climate and CO<sub>2</sub> scenarios. Both the GLM models for FS and FI return values of estimated FS and FI assuming a fire occurs since the models were fitted to observed data for FS and FI. When no fire occurred, there was no data for either FS or FI. As such, these models cannot determine themselves if an ignition occurred.

35 To study changes in FS and FI, it is necessary to apply an ignition threshold, which we obtained from the BA  
36 model. The burnt area (BA) generalized linear model (GLM) provides a robust reconstruction of BA under the  
37 model training conditions with a 0.8 correlation between the observational data and the fitted values(Haas et al.,  
38 2022). There are no systematic biases evident from plotting the residuals of the model but there is a compression  
39 of the range of reconstructed values, leading to apparent over- (under-) prediction at the low (high) extremes. This  
40 is to be expected, as the observational values reflect what really happened over the study period. Whilst some  
41 exceptionally large/intense wildfires occurred, many grid-cells also had no fire activity whilst the fitted values  
42 represent the probability of burning in each grid-cell, regardless of what happened during the study period. We  
43 obtained the ignition threshold value by studying the distribution of reconstructed BA values under the original  
44 model training period (2010-2015) when the observed BA value is 0, representing 26% of the grid-cells (a total  
45 of 14,816 data points and associated fitted values). We then took the median value of these fitted values as a  
46 threshold for ignition.

47

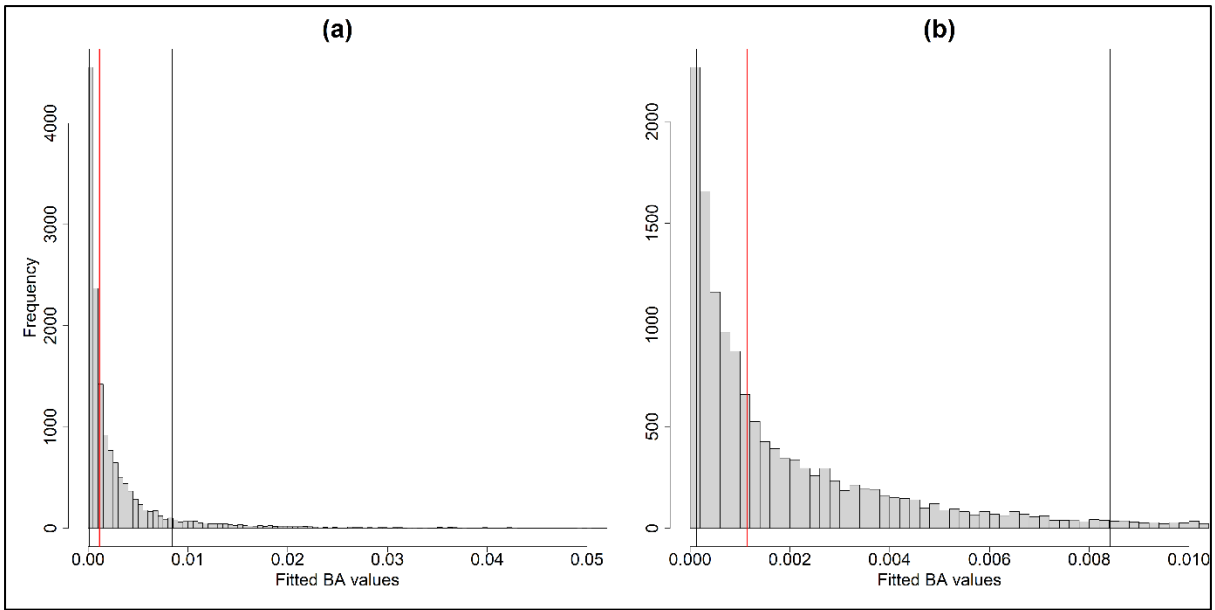

49

50

51

52

53

**Figure S2.1.** Histograms showing the distribution of the fitted values by the GLM BA model when observed BA values are 0 in the 2010-2015 climatology for (a) the whole range and (b) the range up to the 95<sup>th</sup> percentile. The red line shows the median value, and the black lines show the 10<sup>th</sup> and 90<sup>th</sup> percentile values.

|           | 10 <sup>th</sup> percentile | 50 <sup>th</sup> percentile | 90 <sup>th</sup> percentile |
|-----------|-----------------------------|-----------------------------|-----------------------------|
| Fitted BA | 0.0001                      | 0.0011                      | 0.0084                      |

54

55

**Table S1.1.** Statistics for the fitted BA distribution when observed BA is 0 for the 2010-2015 climatology.

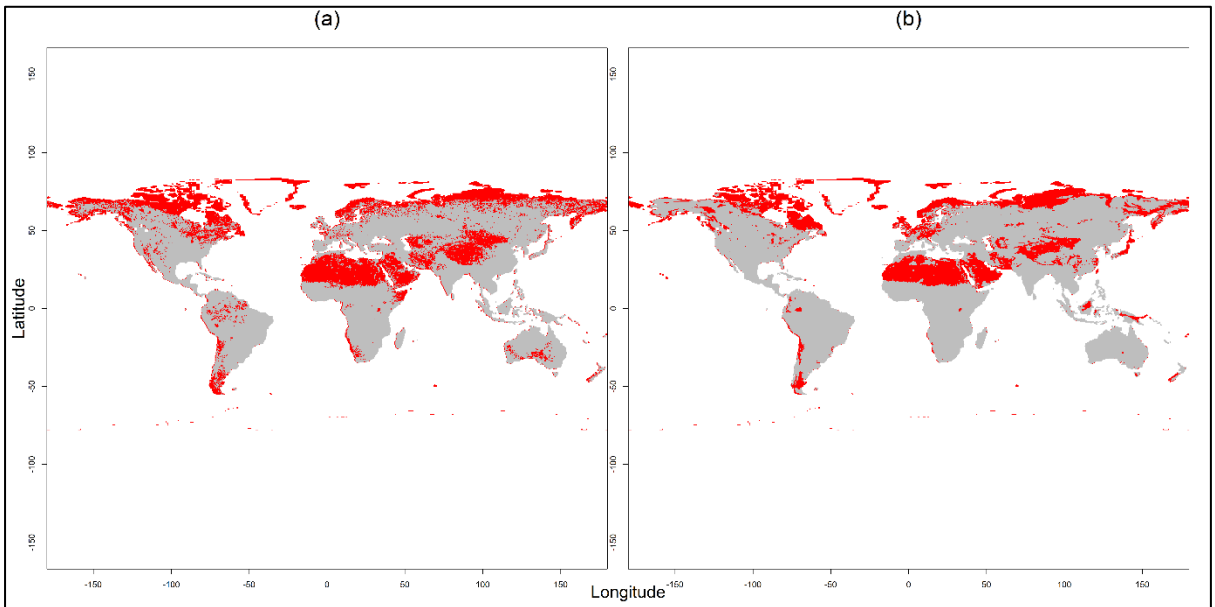

56

57

58

59

**Figure S2.2.** Maps of BA ignition mask (where no burning is assumed to occur) under modern-day conditions (2010-2015 climatology) showing in red (a) where the observational BA values are 0 and (b) where the fitted BA values are equal or lower to 0.0011.

60 **S3. Mapped results from the 12 experiments for all three LGM scenarios.**

61

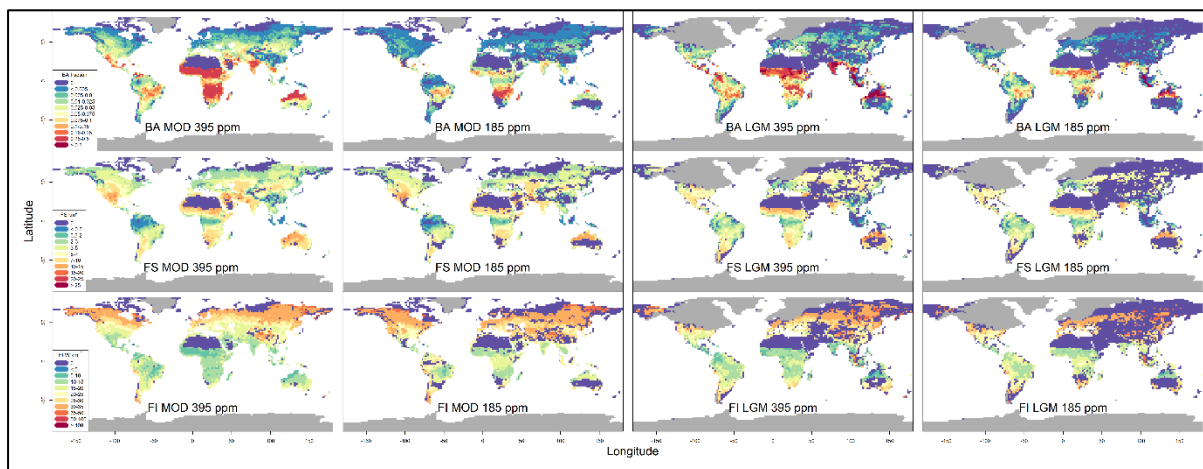

62

63 **Figure S3.1.** Changes in burnt area (BA), fire size (FS) and fire intensity (FI) using modern day climate (MOD)  
64 or Last Glacial Maximum (LGM) climate from the MPI-ESM1.2 simulation with either modern (395 ppm) or  
65 LGM (185 ppm) CO<sub>2</sub>.

66

67

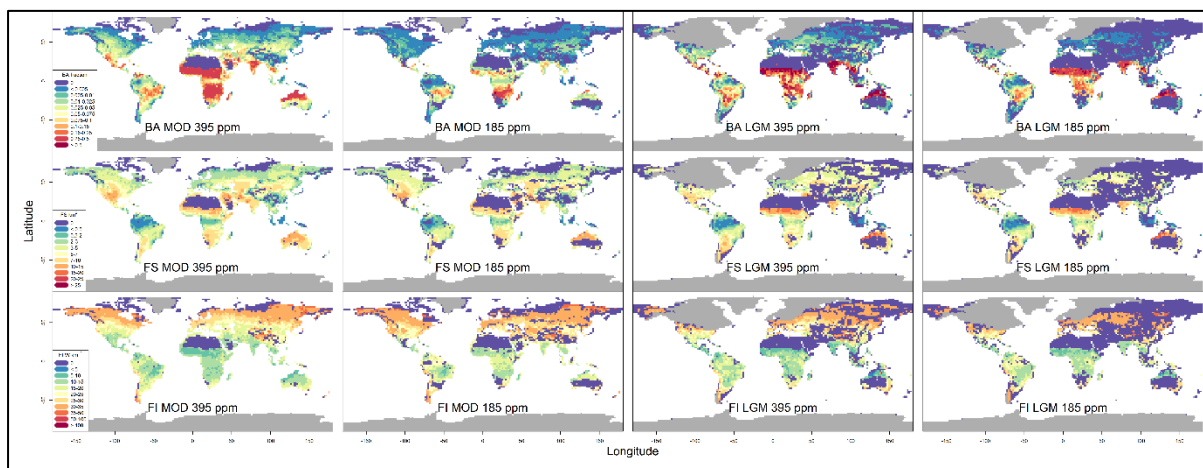

68

69 **Figure S3.2.** Changes in burnt area (BA), fire size (FS) and fire intensity (FI) using modern day climate (MOD)  
70 or Last Glacial Maximum (LGM) climate from the AWIESM1 simulation with either modern (395 ppm) or  
71 LGM (185 ppm) CO<sub>2</sub>.

72

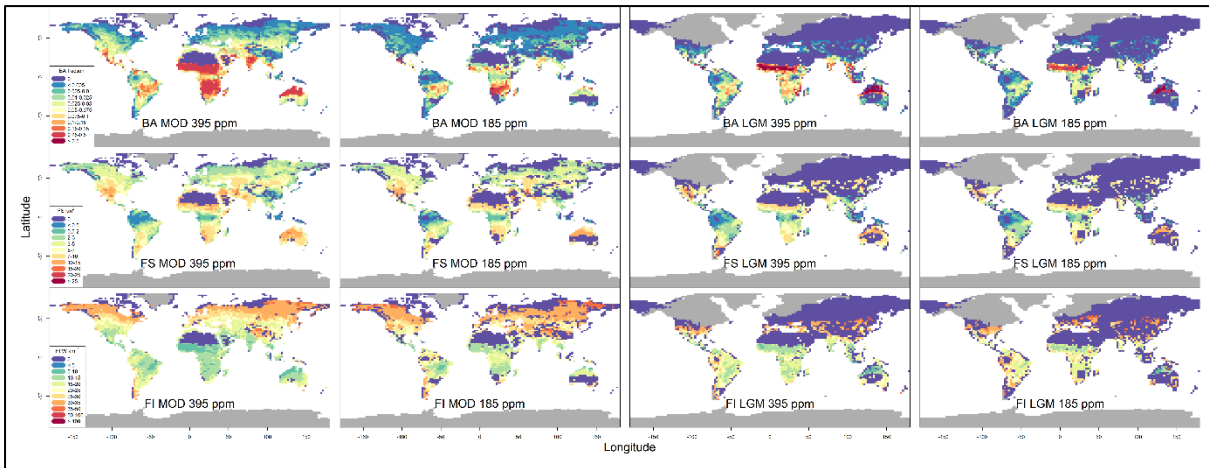

74

75 **Figure S3.3.** Changes in burnt area (BA), fire size (FS) and fire intensity (FI) using modern day climate (MOD)

76 or Last Glacial Maximum (LGM) climate CESM1.2 simulation with either modern (395 ppm) or LGM (185

77 ppm) CO<sub>2</sub>.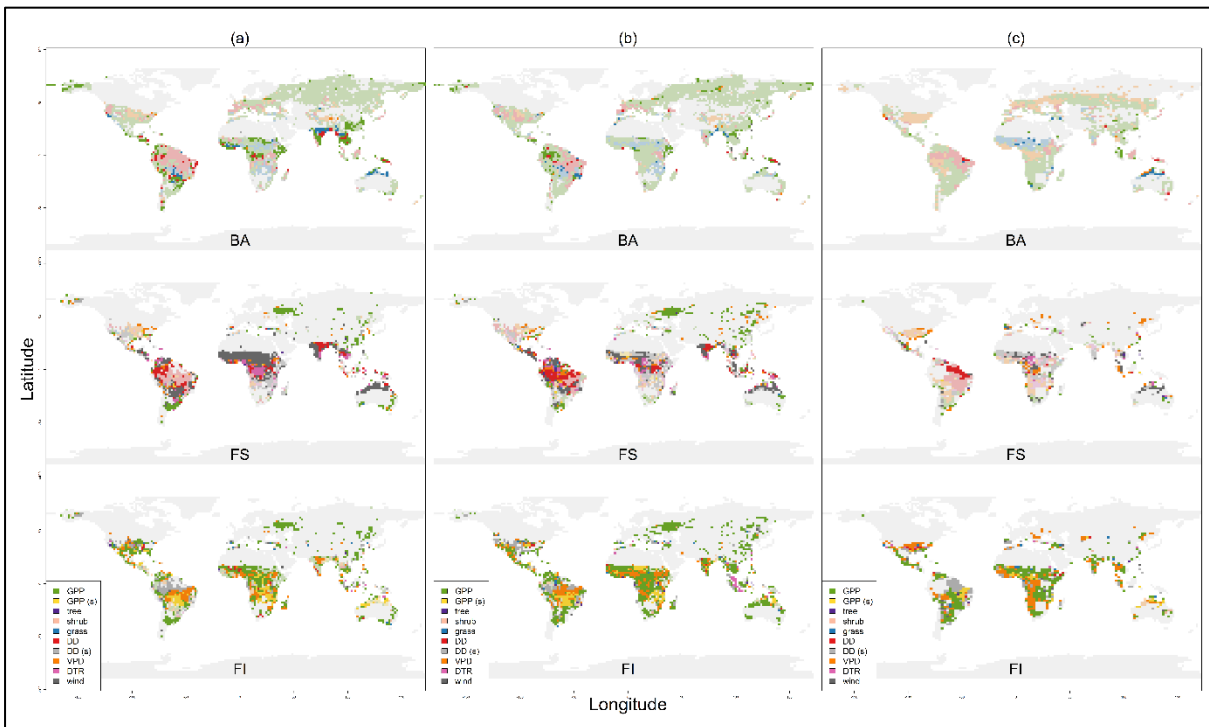

78

79 **Figure S3.4.** Map showing which model variable was responsible for some of the most important grid-cell

80 changes between the realistic modern-day climate (MOD) 395 ppm experiment and the realistic Last Glacial

81 Maximum (LGM) 190 ppm scenarios for BA, FS and FI for (a) the AWIESM1 LGM scenario, (b) the MPI-

82 ESM1.2 LGM scenario and (c) the CESM1.2 LGM scenarios. Faded colors represent that the effect was a

83 negative one, leading to a decrease in the wildfire property at the LGM whilst full colors represent an increase in

84 the wildfire property at the LGM.

85

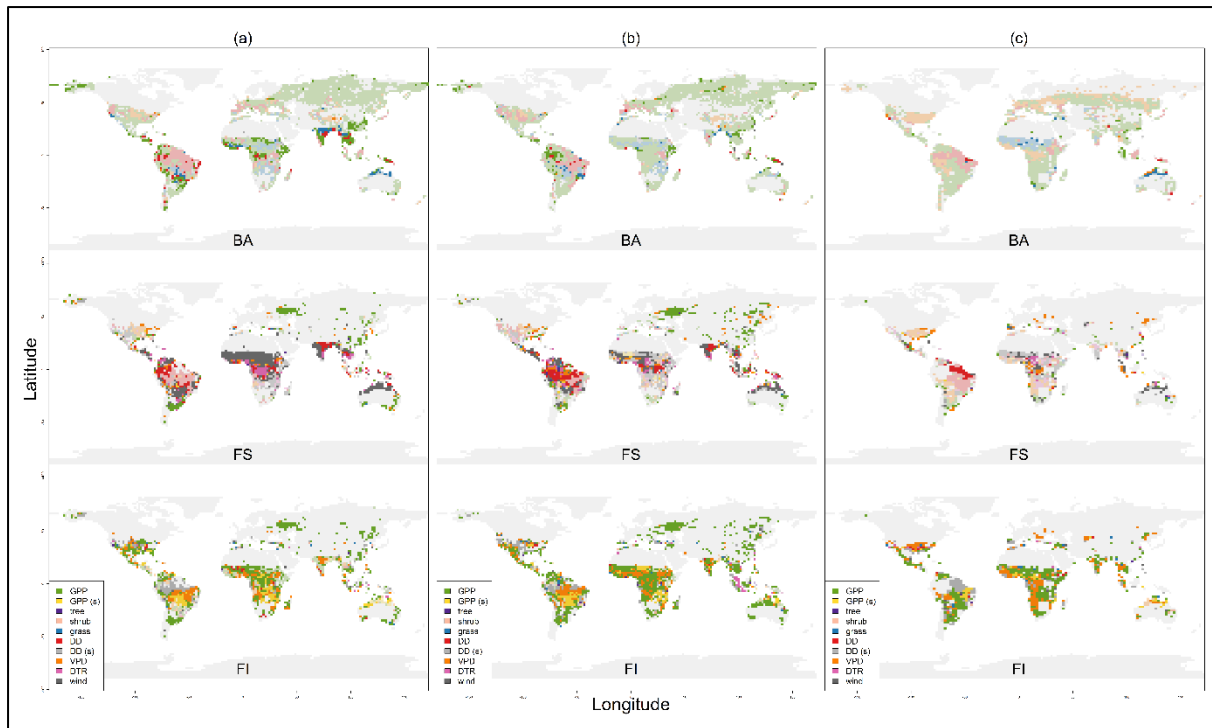

86  
 87  
 88  
 89  
 90  
 91  
 92  
 93

**Figure S3.5.** Map showing which model variable was responsible for some of the most important grid-cell changes between the MOD 395 ppm and LGM 395 ppm experiment (LGM climate/MOD CO<sub>2</sub>) for BA, FS and FI for (a) the AWIESM1 LGM scenario, (b) the MPI-ESM1.2 LGM scenario and (c) the CESM1.2 LGM scenarios. Faded colors represent that the effect was a negative one, leading to a decrease in the wildfire property at the LGM whilst full colors represent an increase in the wildfire property at the LGM.

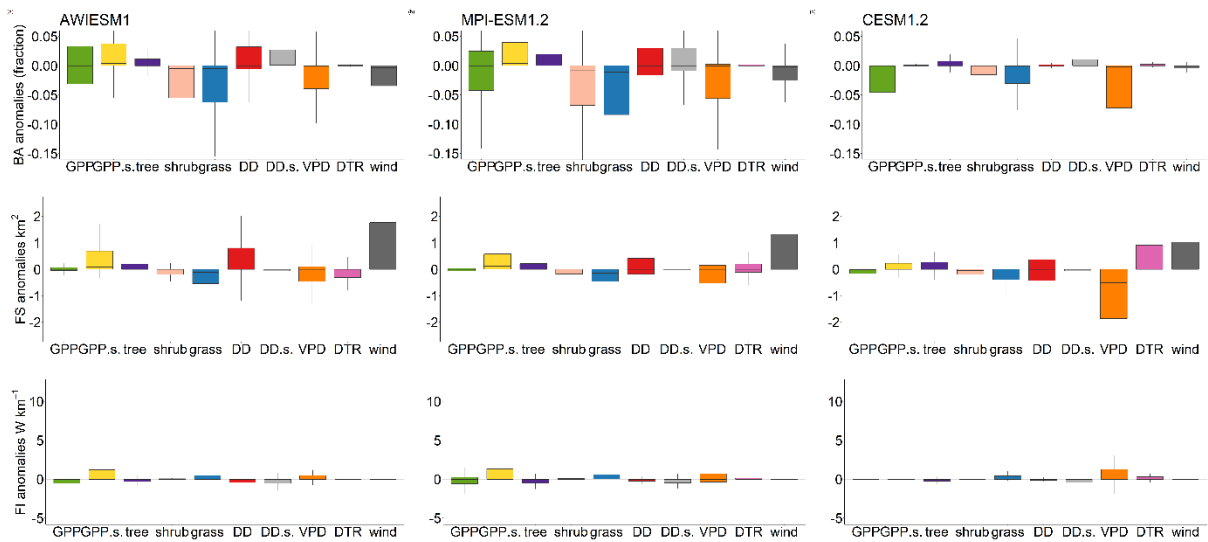

94

95

96

97

98

99

100

101

102

103

104

105

106

107

**Figure S3.6.** Boxplots showing relative importance of each predictor (GPP; gross primary production, GPP.s.; GPP seasonality, tree; tree cover, shrub; shrub cover, grass; grass cover, DD; dry days, DD.s.; dry days seasonality, VPD; vapour pressure deficit, DTR; diurnal temperature range, wind; wind speed) in driving the anomaly between the MOD 395 ppm and LGM 395 ppm experiment. For each grid cell common to both experiments (on modern-day continental shelves and masking the LGM ice sheets), the predictor which cause the largest change in the anomaly between the two experiments when it was excluded from the GLM model was retained, it is the change in anomaly that is shown here. This was taken as an indicator of relative importance of that predictor in driving the observed change for (a) the AWIESM1 LGM scenario, (b) the MPI-ESM-1.2 LGM scenario and (c) the CESM1.2 LGM scenario. A positive anomaly represents the variable driving an increase in BA, FS or FI at the LGM and a negative anomaly represents the variable driving a decrease in BA, FS or FI at the LGM.



108  
 109  
 110  
 111  
 112  
 113  
 114

**Figure S3.7.** Map showing which model variable was responsible for some of the most important grid-cell changes between the realistic MOD 395 ppm and MOD 190 ppm experiment (MOD climate/LGM CO<sub>2</sub>) for BA, FS and FI for (a) the AWIESM1 LGM scenario, (b) the MPI-ESM1.2 LGM scenario and (c) the CESM1.2 LGM scenarios. Faded colors represent that the effect was a negative one, leading to a decrease in the wildfire property at the LGM whilst full colors represent an increase in the wildfire property at the LGM.



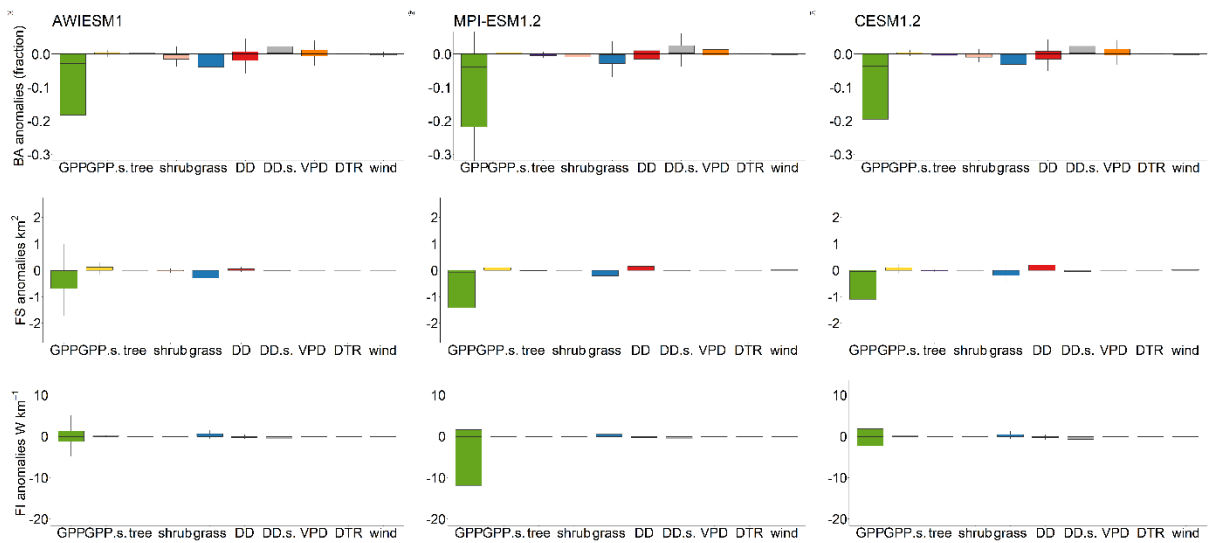

116

117

118

119

120

121

122

123

124

125

126

127

128

129

**Figure S3.8.** Boxplots showing relative importance of each predictor (GPP; gross primary production, GPP.s.; GPP seasonality, tree; tree cover, shrub; shrub cover, grass; grass cover, DD; dry days, DD.s.; dry days seasonality, VPD; vapour pressure deficit, DTR; diurnal temperature range, wind; wind speed) in driving the anomaly between the MOD 395 ppm and MOD 190 ppm experiment. For each grid cell common to both experiments (on modern-day continental shelves and masking the LGM ice sheets), the predictor which cause the largest change in the anomaly between the two experiments when it was excluded from the GLM model was retained, it is the change in anomaly that is shown here. This was taken as an indicator of relative importance of that predictor in driving the observed change for (a) the AWIESM1 LGM scenario, (b) the MPI-ESM-1.2 LGM scenario and (c) the CESM1.2 LGM scenario. A positive anomaly represents the variable driving an increase in BA, FS or FI at the LGM and a negative anomaly represents the variable driving a decrease in BA, FS or FI at the LGM.

130 **S4. Comparison of experiments with charcoal records from the Reading Palaeofire**  
 131 **Database (RPD)**

132

| BA experiments                         |     | MPI_ESM1.2 |     |     | AWIESM1 |     |     | CESM1.2 LGM |     |     |
|----------------------------------------|-----|------------|-----|-----|---------|-----|-----|-------------|-----|-----|
| Scenario                               | RPD | LGM        | MOD | LGM | LGM     | MOD | LGM | LGM         | MOD | LGM |
|                                        |     | 190        | 190 | 395 | 190     | 190 | 395 | 190         | 190 | 395 |
| Negative RPD anomalies                 |     |            |     |     |         |     |     |             |     |     |
| Number of records                      | 35  | 20         | 21  | 13  | 17      | 21  | 10  | 20          | 20  | 17  |
| Successful identification (percentage) |     | 57         | 60  | 37  | 49      | 60  | 29  | 57          | 57  | 49  |
| Positive RPD anomalies                 |     |            |     |     |         |     |     |             |     |     |
| Number of records                      | 16  | 3          | 0   | 8   | 6       | 0   | 5   | 0           | 0   | 3   |
| Successful identification (percentage) |     | 19         | 0   | 50  | 38      | 0   | 31  | 0           | 0   | 19  |
| Total RPD anomalies                    |     |            |     |     |         |     |     |             |     |     |
| Number of records                      | 51  | 23         | 21  | 21  | 23      | 21  | 15  | 20          | 20  | 20  |
| Successful identification (percentage) |     | 45         | 41  | 41  | 45      | 41  | 29  | 39          | 39  | 39  |

133

134 **Table S4.1.** Comparison of sign in BA anomalies (between the MOD climate/MOD CO<sub>2</sub> experiment and other  
 135 three experiments respectively) at the location of each RDP (Harrison et al., 2022) charcoal-based  
 136 reconstructions record. A positive anomaly represents increased biomass burning, and a negative anomaly  
 137 represents decrease biomass burning. A successful identification means that the sign of the experiment anomaly  
 138 and the sign of the RPD charcoal-based reconstructions are the same.

139

| FS experiments                           |     | MPI_ESM1.2 |     |     | AWIESM1 |     |     | CESM1.2 LGM |     |     |
|------------------------------------------|-----|------------|-----|-----|---------|-----|-----|-------------|-----|-----|
| Scenario                                 | RPD | LGM        | MOD | LGM | LGM     | MOD | LGM | LGM         | MOD | LGM |
|                                          |     | 190        | 190 | 395 | 190     | 190 | 395 | 190         | 190 | 395 |
| Negative RPD anomalies                   |     |            |     |     |         |     |     |             |     |     |
| Number records showing reduced burning   | 35  | 10         | 15  | 7   | 11      | 9   | 8   | 10          | 14  | 11  |
| Successful identification (percentage)   |     | 29         | 43  | 20  | 31      | 26  | 23  | 29          | 40  | 31  |
| Positive RPD anomalies                   |     |            |     |     |         |     |     |             |     |     |
| Number records showing increased burning | 16  | 6          | 2   | 7   | 8       | 8   | 9   | 4           | 2   | 4   |
| Successful identification (percentage)   |     | 38         | 13  | 44  | 50      | 50  | 56  | 25          | 13  | 25  |
| Total RPD anomalies                      |     |            |     |     |         |     |     |             |     |     |
| Total number of records                  | 51  | 16         | 17  | 14  | 19      | 17  | 17  | 14          | 16  | 15  |
| Successful identification (percentage)   |     | 31         | 33  | 27  | 37      | 33  | 33  | 27          | 31  | 29  |

141

142 **Table S4.2.** Comparison of sign in FS anomalies (between the MOD climate/MOD CO<sub>2</sub> experiment and other  
143 three experiments respectively) at the location of each RDP (Harrison et al., 2022) charcoal-based  
144 reconstructions record. A positive anomaly represents increased biomass burning, and a negative anomaly  
145 represents decrease biomass burning. A successful identification means that the sign of the experiment anomaly  
146 and the sign of the RPD charcoal-based reconstructions are the same.

147

| FI experiments                           |     | MPI_ESM1.2 |     |     | AWIESM1 |     |     | CESM1.2 LGM |     |     |
|------------------------------------------|-----|------------|-----|-----|---------|-----|-----|-------------|-----|-----|
| Scenario                                 | RPD | LGM        | MOD | LGM | LGM     | MOD | LGM | LGM         | MOD | LGM |
|                                          |     | 190        | 190 | 395 | 190     | 190 | 395 | 190         | 190 | 395 |
| Negative RPD anomalies                   |     |            |     |     |         |     |     |             |     |     |
| Number records showing reduced burning   | 35  | 5          | 7   | 9   | 7       | 7   | 11  | 3           | 5   | 4   |
| Successful identification (percentage)   |     | 14         | 20  | 26  | 20      | 20  | 31  | 9           | 14  | 11  |
| Positive RPD anomalies                   |     |            |     |     |         |     |     |             |     |     |
| Number records showing increased burning | 16  | 10         | 12  | 7   | 10      | 12  | 8   | 9           | 11  | 8   |
| Successful identification (percentage)   |     | 63         | 75  | 44  | 63      | 75  | 50  | 56          | 69  | 50  |
| Total RPD anomalies                      |     |            |     |     |         |     |     |             |     |     |
| Total number of records                  | 51  | 15         | 19  | 16  | 17      | 19  | 19  | 12          | 16  | 12  |
| Successful identification (percentage)   |     | 30         | 37  | 31  | 33      | 37  | 37  | 24          | 31  | 24  |

149

150 **Table S4.3.** Comparison of sign in FI anomalies (between the MOD climate/MOD CO<sub>2</sub> experiment and other  
151 three experiments respectively) at the location of each RDP (Harrison et al., 2022) charcoal-based  
152 reconstructions record. A positive anomaly represents increased biomass burning, and a negative anomaly  
153 represents decrease biomass burning. A successful identification means that the sign of the experiment anomaly  
154 and the sign of the RPD charcoal-based reconstructions are the same.

155

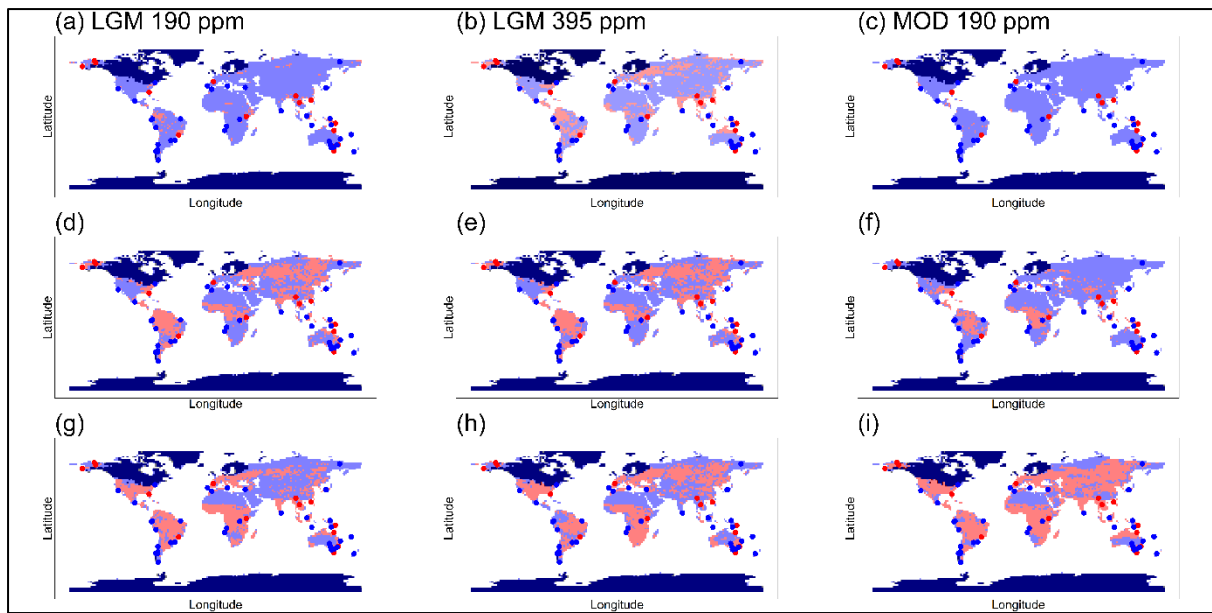

157

158

159

160

161

162

163

164

165

166

167

**Figure S4.1** Comparison of anomalies between the experiment outputs from the MPI-ESM1.2 LGM scenario with charcoal records from the Reading Palaeofire Database (RPD) for (a) the relativistic BA LGM experiment (b) the BA LGM climate/MOD CO<sub>2</sub> sensitivity experiment and (c) the BA MOD climate/LGM CO<sub>2</sub> sensitivity experiment (d) the relativistic FS LGM experiment (e) the FS LGM climate/MOD CO<sub>2</sub> sensitivity experiment and (f) the FS MOD, (g) the relativistic FI LGM experiment (h) the FI LGM climate/MOD CO<sub>2</sub> sensitivity experiment and (i) the FI MOD climate/LGM CO<sub>2</sub> sensitivity experiment climate/LGM CO<sub>2</sub> sensitivity experiment. The modeled positive LGM-MOD anomalies are shown in red and LGM-MOD negative anomalies in blue. Dotted red (positive anomaly) and blue (negative anomaly) points show the location of the RPD records for the LGM. The LGM ice sheets are shown in dark blue.

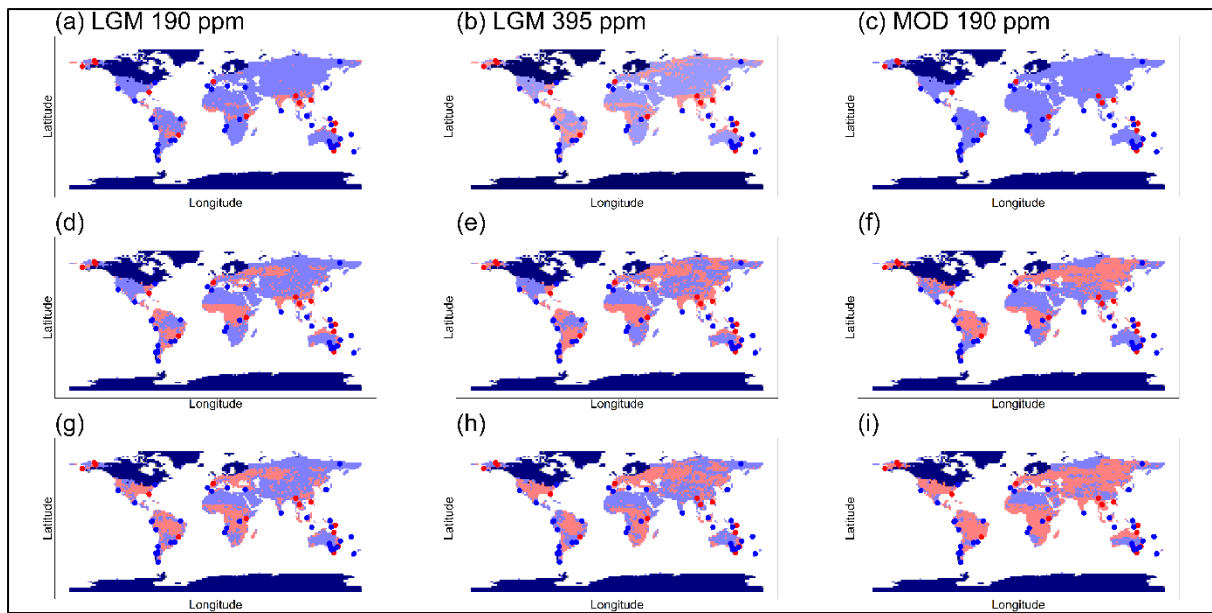

169

170

171 **Figure S4.2** Comparison of anomalies between the experiment outputs from the AWIESM1 LGM scenario with  
 172 charcoal records from the Reading Palaeofire Database (RPD) for (a) the relativistic BA LGM experiment (b) the

173 BA LGM climate/MOD CO<sub>2</sub> sensitivity experiment and (c) the BA MOD climate/LGM CO<sub>2</sub> sensitivity

174 experiment (d) the relativistic FS LGM experiment (e) the FS LGM climate/MOD CO<sub>2</sub> sensitivity experiment and

175 (f) the FS MOD, (g) the relativistic FI LGM experiment (h) the FI LGM climate/MOD CO<sub>2</sub> sensitivity experiment

176 and (i) the FI MOD climate/LGM CO<sub>2</sub> sensitivity experiment climate/LGM CO<sub>2</sub> sensitivity experiment.

177 The modeled positive LGM-MOD anomalies are shown in red and LGM-MOD negative anomalies in blue. Dotted  
 178 red (positive anomaly) and blue (negative anomaly) points show the location of the RPD records for the LGM.

179

The LGM ice sheets are shown in dark blue.

180

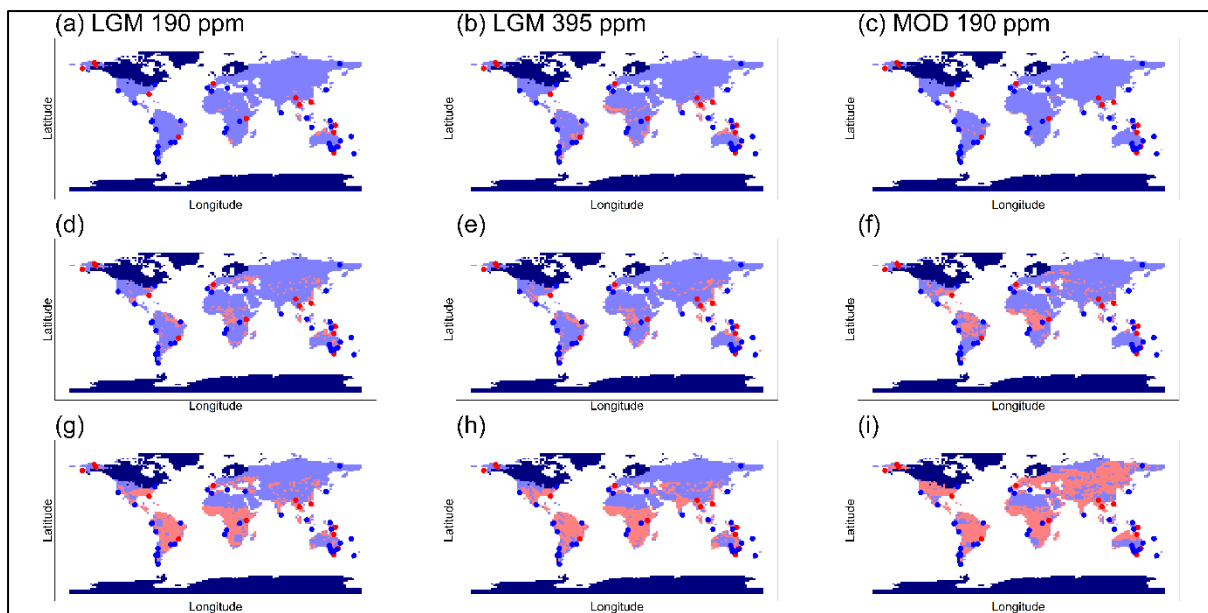

182

183

184

185

186

187

188

189

190

191

192

**Figure S4.3** Comparison of anomalies between the experiment outputs from the CESM1.2 LGM scenario with charcoal records from the Reading Palaeofire Database (RPD) for (a) the relativistic BA LGM experiment (b) the BA LGM climate/MOD CO<sub>2</sub> sensitivity experiment and (c) the BA MOD climate/LGM CO<sub>2</sub> sensitivity experiment (d) the relativistic FS LGM experiment (e) the FS LGM climate/MOD CO<sub>2</sub> sensitivity experiment and (f) the FS MOD, (g) the relativistic FI LGM experiment (h) the FI LGM climate/MOD CO<sub>2</sub> sensitivity experiment and (i) the FI MOD climate/LGM CO<sub>2</sub> sensitivity experiment climate/LGM CO<sub>2</sub> sensitivity experiment. The modeled positive LGM-MOD anomalies are shown in red and LGM-MOD negative anomalies in blue. Dotted red (positive anomaly) and blue (negative anomaly) points show the location of the RPD records for the LGM. The LGM ice sheets are shown in dark blue.

193

## References

194

195

196

197

198

199

200

201

202

203

204

205

206

207

208

- Cucchi, M., Weedon, G. P., Amici, A., Bellouin, N., Lange, S., Müller Schmied, H., Hersbach, H., & Buontempo, C. (2020). WFDE5: bias-adjusted ERA5 reanalysis data for impact studies. *Earth System Science Data*, *12*(3), 2097–2120.
- Haas, O., Prentice, I. C., & Harrison, S. P. (2022). Global environmental controls on wildfire burnt area, size, and intensity. *Environmental Research Letters*, *17*(6), 065004.
- Harrison, S.P., Villegas-Diaz, R., Cruz-Silva, E., Gallagher, D., Kesner, D., Lincoln, P., Shen, Y., Sweeney, L., Colombaroli, D., Ali, A., Barhoumi, C., Bergeron, Y., Blyakharchuk, T., Bobek, P., Bradshaw, R., Clear, J.L., Czerwiński, S., Daniau, A-L., Dodson, J., Edwards, K.J., Edwards, M.E., Feurdean, A., Foster, D., Gajewski, K., Gałka, M., Garneau, M., Giesecke, T., Gil Romera, G., Girardin, M.P., Hoefler, D., Huang, K., Inoue, J., Jamrichová, E., Jasiunas, N., Jiang, W., Jiménez-Moreno, G., Karpińska-Kołaczek, M., Kołaczek, P., Kuosmanen, N., Lamentowicz, M., Lavoie, M., Li, F., Li, J., Lisitsyna, O., López-Sáez, J.A., Luemo-Lautenschlaeger, R., Magnan, G., Magyari, E.K., Maksims, A., Marcisz, K., Marinova, E., Marlon, J., Mensing, S., Miroslaw-Grabowska, J., Oswald, W., Pérez-Díaz, S., Pérez-Obiol, R., Piilo, S., Poska, A., Qin, X., Remy, C.C., Richard, P.J.H., Salonen, S., Sasaki, N., Schneider, H., Shotyk, W., Stancikaite, M., Šteinberga, D., Stivrins, N., Takahara, H., Tan, Z., Trasune, L., Umbanhowar, C.E., Välranta, M., Vassiljev,

209 J., Xiao, X., Xu, Q., Xu, X., Zawisza, E., Zhao, Y., Zhou, Z., & Paillard, J. (2022). The Reading Palaeofire  
210 database: an expanded global resource to document changes in fire regimes from sedimentary charcoal  
211 records *Earth System Science Data* 14: 1109-1124 <https://doi.org/10.5194/essd-14-1109-2022>

212 Kaplan, J.O., Bigelow, Prentice, I.C., Harrison, S.P., P.J., N.H., Bartlein, Christensen, T.R., Cramer, W.,  
213 Matveyeva, N.V., McGuire, A.D., Murray, D.F., Razzhivin, V.Y., Smith, B. and Walker, D.A., Anderson,  
214 P.M., Andreev, A.A., Brubaker, L.B., Edwards, M.E., & Lozhkin, A.V. (2003). Climate change and Arctic  
215 ecosystems II: Modeling, palaeodata-model comparisons, and future projections. *Journal of Geophysical*  
216 *Research-Atmosphere* 108, No. D19, 8171. (DOI: 10.1029/2002JD002559).

217 Saitoh, T. M., Nagai, S., Noda, H. M., Muraoka, H., & Nasahara, K. N. (2012). Examination of the extinction  
218 coefficient in the Beer–Lambert law for an accurate estimation of the forest canopy leaf area index. *Forest*  
219 *Science and Technology*, 8(2), 67–76.

220
